# Supplementary material for: Automatic construction of molecular similarity networks for visual graph mining in chemical space of bioactive peptides: an unsupervised learning approach
Source: PubMed Central journal article supplement (PMC7583304; doi:10.1038/s41598-020-75029-1), 2020-10-22
Supplement: 41598_2020_75029_MOESM8_ESM.pdf [file 41598_2020_75029_MOESM8_ESM.pdf]

# Automatic construction of molecular similarity networks for visual graph mining in chemical space of bioactive peptides: an unsupervised learning approach

Longendri Aguilera-Mendoza<sup>1</sup>, Yovani Marrero-Ponce<sup>2,3,4,\*</sup>, César R. García-Jacas<sup>5</sup>, Edgar Chavez<sup>1</sup>, Jesus A. Beltran<sup>1</sup>, Hugo A. Guillen-Ramirez<sup>6,7</sup>, and Carlos A. Brizuela<sup>1,\*</sup>

<sup>1</sup>Departamento de Ciencias de la Computación, Centro de Investigación Científica y de Educación Superior de Ensenada (CICESE), Baja California, 22860, Mexico

<sup>2</sup>Universidad San Francisco de Quito, Grupo de Medicina Molecular y Traslacional (MeM&T), Escuela de Medicina, Colegio de Ciencias de la Salud (COCSA), Av. Interoceánica Km 12 1/2 y Av. Florencia, 17-1200-841, Quito, Ecuador.

<sup>3</sup>Grupo GINUMED, Corporacion Universitaria Rafael Nuñez. Facultad de Salud. Programa de Medicina, Cartagena, Colombia.

<sup>4</sup>Unidad de Investigación de Diseño de Fármacos y Conectividad Molecular, Departamento de Química Física, Facultad de Farmacia, Universitat de València, Spain.

<sup>5</sup>Cátedras Conacyt - Departamento de Ciencias de la Computación, Centro de Investigación Científica y de Educación Superior de Ensenada (CICESE), Ensenada, Baja California, Mexico.

<sup>6</sup>Department of BioMedical Research (DBMR), University of Bern, Bern 3008, Switzerland

<sup>7</sup>Department of Medical Oncology, Inselspital, University Hospital and University of Bern 3010, Switzerland

\*ymarrero77@yahoo.es; cbrizuel@cicese.mx

## ABSTRACT

Algorithm SI2-1: Feature ranking and filtering.

Algorithm SI2-2: Feature subset optimization.

Algorithm SI2-3: Parallel construction of the HSP network.

## Algorithm SI2-1

---

### Algorithm 1: Feature ranking and filtering

---

```
input : A descriptor matrix  $\mathcal{D} = [x_{ij}]_{n \times m}$ , an entropy threshold  $\theta_1$ , a correlation method corr_method, and correlation-based similarity threshold  $\theta_2$ 
output : A subset  $F$  of candidate features
/* Entropy-based filtering */
F  $\leftarrow$  {j | j = 1...m}; /* Initialize the candidate set */
for j = 1 to m do /* It is defined in Eq. 2 */
     $f_j$ .entropy  $\leftarrow$  H( $f_j$ );
    if  $f_j$ .entropy <  $\theta_1$  then /* Removing irrelevant features */
        F  $\leftarrow$  F \ { $f_j$ };
    end
end
rankedFeatures  $\leftarrow$  Sort features in F by descending order of their entropy values;
/* Correlation-based filtering */
for j = 1 to sizeOf(rankedException) - 1 do
    for k = j + 1 to sizeOf(rankedException) do
        if corr_method = "pearson" then
            |  $sim(f_j, f_k) \leftarrow |\rho(f_j, f_k)|$ ; /* It is defined in Eq. 5 */
        else
            if corr_method = "spearman" then
                |  $sim(f_j, f_k) \leftarrow |r_s(f_j, f_k)|$ ; /* It is defined in Eq. 6 */
            end
        end
        if  $sim(f_j, f_k) \geq \theta_2$  then /* Removing redundant features */
            F  $\leftarrow$  F \ { $f_k$ };
        end
    end
end
end
```

---

## Algorithm SI2-2

---

### Algorithm 2: Feature subset optimization

---

```
input : A candidate feature set  $F$ 
output : A subset  $F^*$  of optimized features
/* Second stage: subset optimization */
F*  $\leftarrow$  F; /* Candidate feature set */
best_merit  $\leftarrow$   $\Phi(F^*)$ ; /* It is defined in Eq. 7 */
success  $\leftarrow$  true;
while success do
    success  $\leftarrow$  false;
    foreach  $f_j \in F^*$  do
        F'  $\leftarrow$  F* \ { $f_j$ };
        merit  $\leftarrow$   $\Phi(F')$ ;
        if merit > best_merit then
            | best_merit  $\leftarrow$  merit;
            | best_subset  $\leftarrow$  F';
            | success  $\leftarrow$  true;
        end
    end
end
if success then
    | F*  $\leftarrow$  best_subset;
end
end
```

---

## Algorithm SI2-3

---

### Algorithm 3: Parallel construction of the HSP network

---

```

input : A descriptor matrix  $\mathcal{D} = [x_{ij}]_{n \times m}$ , and distance function  $d$ 
output : A weighted graph  $G' = (V, E', w)$  with a weight  $w : E' \rightarrow [0, 1]$ 
 $V \leftarrow \{i \mid i = 1 \dots n\}$ ;
 $E' \leftarrow \emptyset$ ;
 $maxDist \leftarrow 0$ ;
for  $u = 1$  to  $n$  do in parallel
    candidates  $\leftarrow$  Array[0... $n-1$ ];                                     /* Candidate neighbors to node  $u$  */
    cursor  $\leftarrow$  0;
    foreach  $v \in V$  do
        if  $v \neq u$  then
             $dist \leftarrow d(u, v)$ ;                                     /* Calculating distance  $d$  in the space  $\mathcal{D}$  */
            candidates[cursor]  $\leftarrow$  Candidate( $v, dist$ );
            cursor  $\leftarrow$  cursor + 1;
        end
    end
    Sort candidates by ascending order of their distances to node  $u$ ;
    largeDist  $\leftarrow$  candidates[ $n-1$ ].distance;
    cursor  $\leftarrow$  0;
    while cursor <  $n-1$  do
        if candidates[cursor]  $\neq$  null then
             $v \leftarrow$  candidates[cursor].node;                         /* Nearest candidate node to  $u$  */
             $dist \leftarrow$  candidates[cursor].distance;
            writeLock();                                               /* Synchronizing access to a shared resource  $E'$  */
             $E' \leftarrow E' \cup \{(u, v)\}$ ;
            writeUnlock();
            /* Ignoring candidates in the forbidden area for node  $u$  */
            for  $k = cursor + 1$  to  $n-1$  do
                if candidates[ $k$ ]  $\neq$  null then
                     $dist \leftarrow d(v, candidates[k].node)$ ;
                    if  $dist <$  candidates[ $k$ ].distance then
                        candidates[ $k$ ]  $\leftarrow$  null;                     /* Ignore candidate nodes closer to  $v$  than to  $u$  */
                    end
                end
            end
            cursor  $\leftarrow$  cursor + 1;
        end
    end
    writeLock();                                                       /* Synchronizing access to a shared resource  $maxDist$  */
    if largeDist > maxDist then
        maxDist  $\leftarrow$  largeDist;
    end
    writeUnlock();
end
foreach  $(u, v) \in E'$  do
     $w(u, v) \leftarrow sim(u, v) \leftarrow 1 - \frac{d(u, v)}{maxDist}$ ;           /* The similarity defined in Eq. 8 */
end

```

---
